# Supplementary material for: Pyruvate Treatment Restores the Effectiveness of Chemotherapeutic Agents in Human Colon Adenocarcinoma and Pleural Mesothelioma Cells
Source: MDPI journal article supplement (doi:10.3390/ijms19113550), 2018-11-10
Supplement: s1 [file s1]

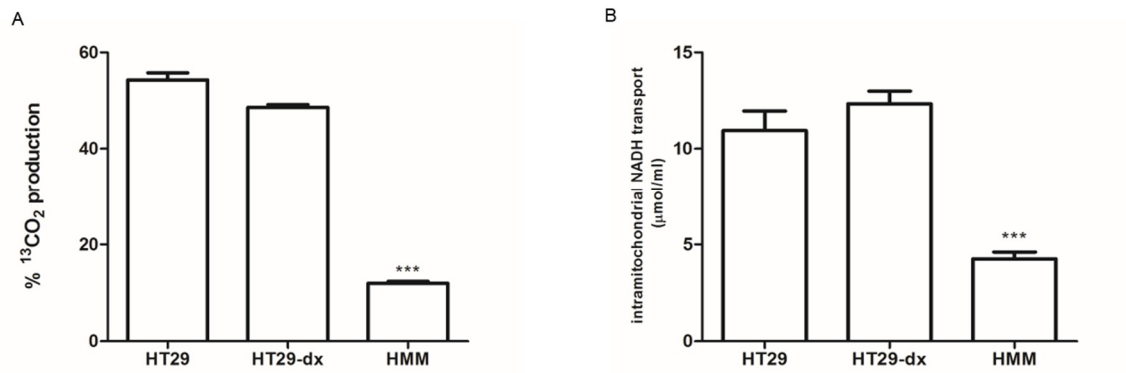

**Figure S1.** CO<sub>2</sub> formation (A) and intramitochondrial NADH transport (B) levels in HT29, HT29-dx and HMM cancer cells. Results in quadruplicate are presented as means ± SEM ( $n = 4$ ), HMM versus HT29: \*\*\*  $p < 0.0001$ .
